# Supplementary material
Source: HighWire-hosted journal article supplement (https://srh.bmj.com/content/bmjsrh-2020-200766)
Supplement: inline-supplementary-material-1 [file inline-supplementary-material-1.pdf]

---

## Supplementary information: Appendix methods

### Appendix method

#### Multi-stage sampling

Using multi-stage sampling, 241 institutions of higher learning were selected after balancing the population density, and different levels of educational institutions in China, according to the List of Institutions of Higher Learning released by China's Ministry of Education in 2018 [1].

In Stage 1, all of higher education institutions were classified into three categories (eastern, central and western regions) based on the administrative divisions provided by the National Bureau of Statistics of China. In Stage 2, select full-time universities and colleges (excluding adult colleges) from each region. Universities are divided into 4 levels: first-class universities, first-class disciplines universities, ordinary universities, and private universities. Colleges are divided into 3 levels: key colleges, ordinary colleges, and private colleges. In Stage 3, probability proportional to size (PPS) method was used to select universities and colleges from each level and a total of 241 higher education institutions were selected. In the final stage, by using the chain communication effect of social network, the questionnaire was sent out to select undergraduates. All the samples are volunteers recruited in the form of convenience sampling. Participation in the survey is decided by the students themselves and can be withdrawn at any time during the process.

#### Attention Check Questions

Using Attention Check Questions (ACQs) to screen out inattentive respondents.

ACQs were included in different parts of the survey, asked participants “It’s important that you pay attention to this study. Please tick ‘Don’t know’” or “Make sure to select ‘Don’t know’ as an answer so that we know you are paying attention”.

1 National Bureau of Statistics of China. China statistical yearbook. *Beijing Chinese Stat Bur* 2018.
